# Supplementary material for: CircNFIC Balances Inflammation and Apoptosis by Sponging miR-30e-3p and Regulating DENND1B Expression
Source: MDPI journal article supplement (doi:10.3390/genes12111829), 2021-11-19
Supplement: s1 [file s1]

## Supplementary Material

### 1. Supplementary Figures

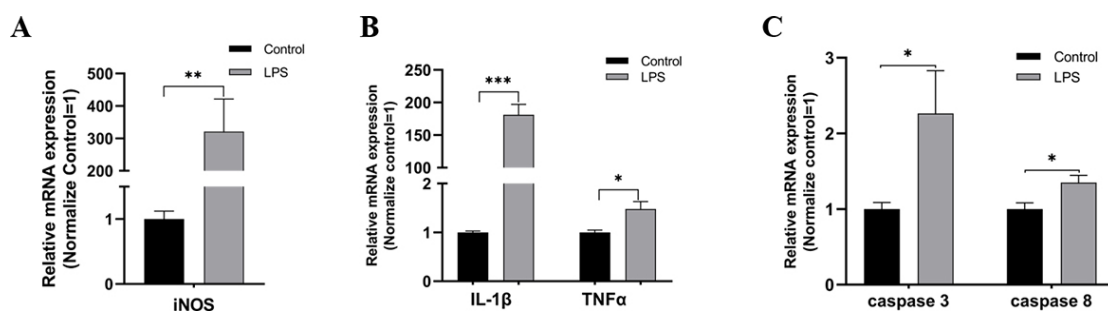

**Supplementary Figure S1. The inflammatory model was constructed inducing by LPS.** (a) The mRNA expression of iNOS was significantly promoted by LPS. (b) The mRNA expression of IL-1 $\beta$  and TNF- $\alpha$  were significantly promoted by LPS. (c) The mRNA expression of caspase 3 and caspase 8 were significantly promoted by LPS.

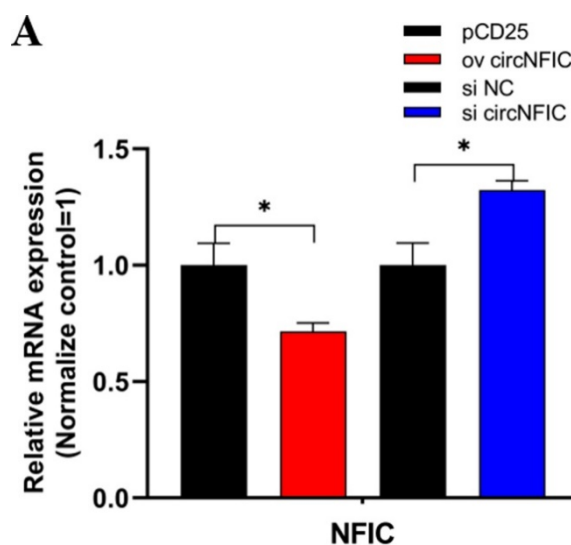

**Supplementary Figure S2. The mRNA of NFIC could be suppressed by circNFIC.** (a) The mRNA expression of NFIC could be suppressed by circNFIC.

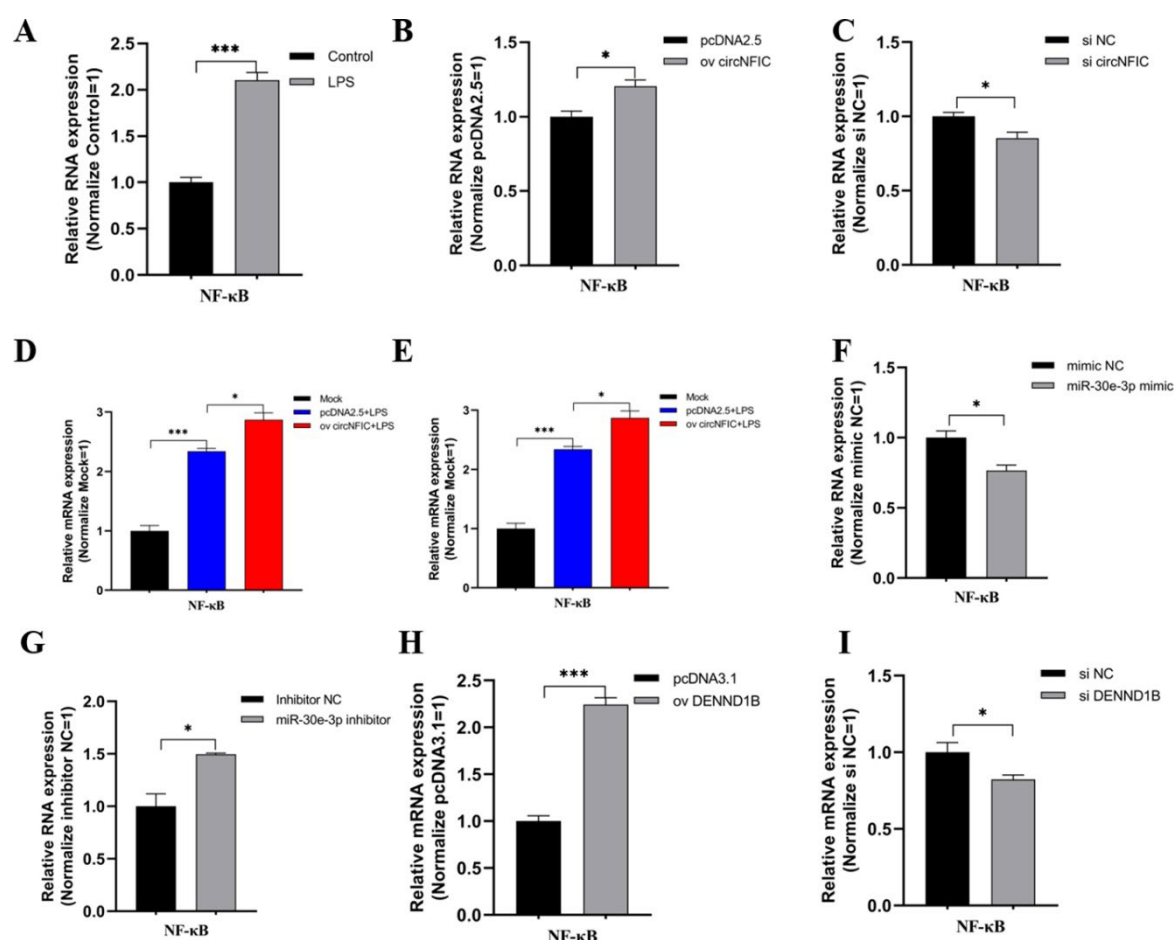

**Supplementary Figure S3. The circNFIC balanced the expression of NFκB by miR-30e-3p/DENND1B axis.** (a) The mRNA expression of NFκB was significantly promoted by LPS. (b, c) The expression levels of NFκB with overexpression and knockdown of circNFIC in HD11. (d, e) The expression levels of NFκB with overexpression and knockdown of miR-30e-3p in HD11. (f, g) The expression levels of NFκB with overexpression and knockdown of DENND1B in HD11. (h, j) The expression levels of NFκB could be regulated by circNFIC, miR-30e-3p, and DENND1B in HD11 exposing to LPS.

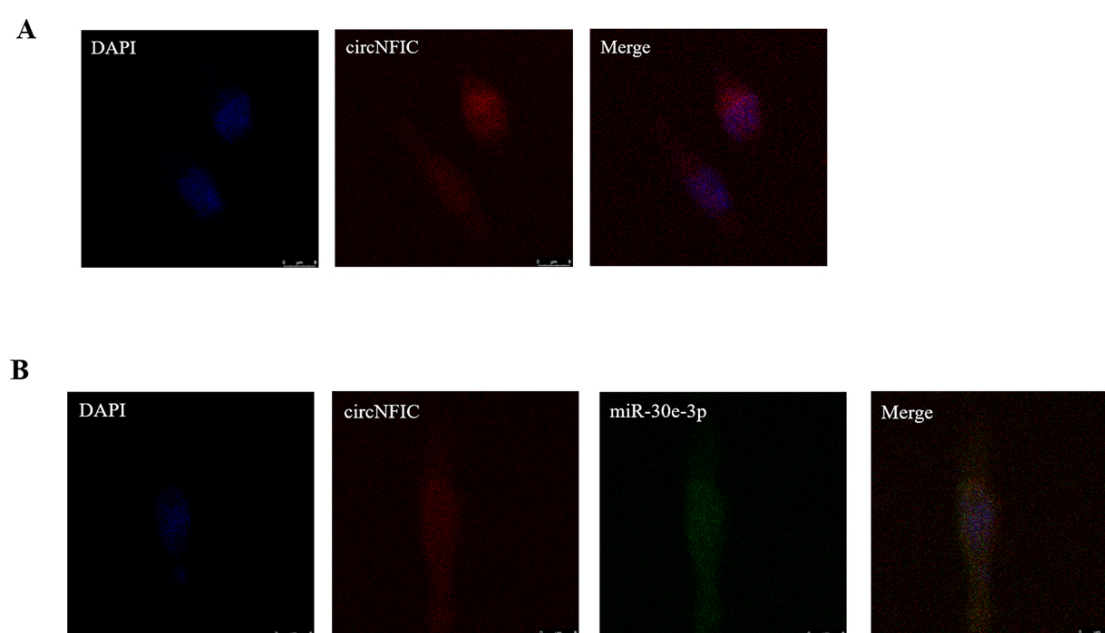

**Supplementary Figure S4. RNA-FISH revealed the localization of circNFIC and miR-30e-3p.** (a) RNA-FISH revealed the localization of circNFIC. (b) RNA-FISH revealed the co-localization of circNFIC and miR-30e-3p. The circACSL1 probes were labeled with CY3 (red), miR-30e-3p probes were labeled with FAM. Nuclei were stained with DAPI (blue).

## 2. Supplementary table

Supplementary Table S1. The primers used in this study.

| Primer name       | Fragment sequence (5'-3') | Application |
|-------------------|---------------------------|-------------|
| NFIC-F            | ACCACATCAGCGTCTCCGTC      | PCR         |
| NFIC-R            | GCGTTCGGGACACCTGGAT       | PCR         |
| circNFIC-qF       | ACGGCCTCCACCTATTTC        | qPCR        |
| circNFIC-qR       | TGTCCAGTTGCGGCTGCTACT     | qPCR        |
| DENND1B-qF        | ACCAGCACCTCAATAACCA       | qPCR        |
| DENND1B-qR        | GCTCAGCGTGTCCAATATC       | qPCR        |
| IL-1 $\beta$ -qF  | TCGGGTTGGTTGGTGATG        | qPCR        |
| IL-1 $\beta$ -qR  | TGGGCATCAAGGGCTACA        | qPCR        |
| TNF- $\alpha$ -qF | TTCTATGACCGCCCAGTT        | qPCR        |
| TNF- $\alpha$ -qR | CAGAGCATCAACGCAAAA        | qPCR        |
| IFN $\gamma$ -qF  | GACATCCTTCAGCATCTCTTCA    | qPCR        |
| IFN $\gamma$ -qR  | AGGCGCTGTAATCGTTGTCT      | qPCR        |
| iNOS-qF           | CCGTTGAAAGGACACGCAGT      | qPCR        |
| iNOS-qR           | TATTTGAATACCCGCCAGAG      | qPCR        |
| caspase 3-qF      | TGGCCCTCTTGAAGTGAAG       | qPCR        |
| caspase 3-qR      | TCCACTGTCTGCTTCAATACC     | qPCR        |
| caspase 8-qF      | CCCTGAAGACAGTGCCATTT      | qPCR        |
| caspase 8-qR      | GGGTCGGCTGGTCATTTTAT      | qPCR        |
| NF $\kappa$ B-qF  | AGGATGAGAATGGTGGTATG      | qPCR        |

|            |                       |      |
|------------|-----------------------|------|
| NFκB-qR    | CAGATTTCCGACGTAGTTGT  | qPCR |
| NFIC-qF    | TACCTGCCCACGCAGATGCTG | qPCR |
| NFIC-qR    | CGTCCCTCCCTCCGAAGTTGT | qPCR |
| β-actin-qF | TTGTTGACAATGGCTCCGGT  | qPCR |
| β-actin-qR | AACCATCACACCCTGATGTCT | qPCR |

Supplementary Table S2. RNA oligonucleotides sequence information.

| Sequence name        | Fragment sequence (5'-3') | Application               |
|----------------------|---------------------------|---------------------------|
| si-circNFIC_001      | GACCGGAGCAAACGGCACA       | circNFIC knockdown        |
| si-circNFIC_002      | ACCGGAGCAAACGGCACAA       | circNFIC knockdown        |
| si-DENND1B_001       | CAAAGAGTCTGGACTTCTT       | DENND1B knockdown         |
| si-DENND1B_002       | GCATCGTTCCAGTACTACA       | DENND1B knockdown         |
| si-DENND1B_003       | GGATGTACACCGTGAAGAA       | DENND1B knockdown         |
| miR-30e-3p mimic     | UUUCAGUCGGAUGUUUACAGC     | miR-30e-3p overexpression |
| miR-30e-3p inhibitor | GCUGUAAACAUCCGACUGAAA     | miR-30e-3p knockdown      |
